# Supplementary material for: Hypervalent Nonbonded Interactions of a Divalent Sulfur Atom. Implications in Protein Architecture and the Functions
Source: Molecules. 2012 Jun 13;17(6):7266–83. doi: 10.3390/molecules17067266 (PMC6269016; doi:10.3390/molecules17067266)
Supplement: Supplementary file 1 [file molecules-17-07266-s001.pdf]

Review

## Hypervalent Nonbonded Interactions of a Divalent Sulfur Atom. Implications in Protein Architecture and the Functions

Michio Iwaoka \* and Noriyoshi Isozumi

Department of Chemistry, School of Science, Tokai University, Kitakaname, Hiratsuka-shi, Kanagawa 259-1292, Japan

\* Author to whom correspondence should be addressed; E-Mail: miwaoka@tokai.ac.jp;  
Tel.: +81-463-58-1211; Fax: +81-463-50-2094.

Received: 21 May 2012; in revised form: 6 June 2012 / Accepted: 8 June 2012 /

Published: 13 June 2012

---

### Supporting Information

**Table S1.** Nonbonded S...X interactions found in RNase A.

**Table S2.** Nonbonded S...X interactions found in insulin.

**Table S3.** Nonbonded S...X interactions found in lysozyme.

**Table S1.** Nonbonded S...X interactions found in RNase A.Distances (r) and the relative distances [ $d = r - \text{vdw}(\text{S}) - \text{vdw}(\text{X})$ ] are given in Å.

| PDBID | Resolution | Chain | S(C26)...O $\gamma$ (T99) |          | S(C65)...O(Q69) |          | S(C58)...N(P117) |          |
|-------|------------|-------|---------------------------|----------|-----------------|----------|------------------|----------|
|       |            |       | r(S...O)                  | d(S...O) | r(S...O)        | d(S...O) | r(S...N)         | d(S...N) |
| 1a5p  | 1.6        |       |                           |          | 3.458           | 0.138    | 3.484            | 0.134    |
| 1afk  | 1.7        | A     | 3.109                     | −0.211   |                 |          | 3.485            | 0.135    |
| 1afk  | 1.7        | B     | 3.128                     | −0.192   |                 |          |                  |          |
| 1afl  | 1.7        | A     | 3.177                     | −0.143   | 3.456           | 0.136    | 3.512            | 0.162    |
| 1afl  | 1.7        | B     | 3.230                     | −0.090   | 3.501           | 0.181    |                  |          |
| 1afu  | 2          | A     | 3.253                     | −0.067   |                 |          |                  |          |
| 1afu  | 2          | B     | 3.142                     | −0.178   |                 |          |                  |          |
| 1aqp  | 2          |       |                           |          |                 |          | 3.443            | 0.093    |
| 1bel  | 1.6        | A     | 3.259                     | −0.061   |                 |          | 3.444            | 0.094    |
| 1c8w  | 1.8        | A     | 3.240                     | −0.080   | 3.426           | 0.106    | 3.499            | 0.149    |
| 1c9v  | 1.7        | A     | 3.176                     | −0.144   | 3.404           | 0.084    | 3.498            | 0.148    |
| 1c9x  | 1.8        | A     | 3.179                     | −0.141   | 3.407           | 0.087    |                  |          |
| 1dy5  | 0.87       | A     | 3.115                     | −0.206   | 3.471           | 0.151    | 3.493            | 0.143    |
| 1dy5  | 0.87       | B     | 3.050                     | −0.270   |                 |          |                  |          |
| 1eic  | 1.4        | A     | 3.222                     | −0.098   | 3.515           | 0.195    | 3.393            | 0.043    |
| 1eid  | 1.4        | A     | 3.283                     | −0.037   | 3.210           | −0.110   | 3.464            | 0.114    |
| 1eie  | 1.4        | A     | 3.202                     | −0.118   | 3.517           | 0.197    | 3.414            | 0.064    |
| 1f0v  | 1.7        | A     | 3.150                     | −0.170   |                 |          |                  |          |
| 1fs3  | 1.4        | A     | 3.272                     | −0.048   |                 |          | 3.407            | 0.057    |
| 1jn4  | 1.8        | A     | 3.146                     | −0.174   | 3.446           | 0.126    | 3.461            | 0.111    |
| 1jn4  | 1.8        | B     | 3.086                     | −0.234   |                 |          |                  |          |
| 1jvu  | 1.78       | A     | 3.221                     | −0.100   | 3.513           | 0.193    | 3.509            | 0.159    |
| 1jvu  | 1.78       | B     | 3.255                     | −0.065   |                 |          |                  |          |
| 1lsq  | 1.9        | A     | 3.155                     | −0.165   | 3.316           | −0.004   |                  |          |
| 1lsq  | 1.9        | B     | 3.206                     | −0.114   | 3.346           | 0.026    |                  |          |
| 1qhc  | 1.7        | A     | 3.062                     | −0.258   | 3.507           | 0.187    | 3.455            | 0.105    |
| 1qhc  | 1.7        | B     | 3.153                     | −0.167   |                 |          |                  |          |
| 1rbw  | 1.69       | —     | 3.272                     | −0.048   | 3.384           | 0.064    | 3.484            | 0.134    |
| 1rbx  | 1.69       | —     | 3.332                     | 0.012    | 3.493           | 0.173    | 3.514            | 0.164    |
| 1rca  | 1.9        | —     | 3.381                     | 0.061    | 3.355           | 0.035    | 3.532            | 0.182    |
| 1rnd  | 1.5        | —     | 3.276                     | −0.044   | 3.427           | 0.107    | 3.440            | 0.090    |
| 1rnm  | 2          | E     | 3.109                     | −0.211   |                 |          | 3.482            | 0.132    |
| 1rnn  | 1.8        | E     | 3.168                     | −0.153   |                 |          | 3.534            | 0.184    |
| 1rno  | 1.9        | —     | 3.262                     | −0.058   |                 |          | 3.533            | 0.183    |
| 1rnq  | 2          | —     | 3.306                     | −0.014   |                 |          |                  |          |
| 1rnw  | 1.8        | —     | 3.248                     | −0.072   |                 |          | 3.529            | 0.179    |
| 1rmx  | 1.9        | —     | 3.268                     | −0.052   |                 |          |                  |          |
| 1rny  | 2          | —     | 3.292                     | −0.029   | 3.415           | 0.095    |                  |          |
| 1rmz  | 1.9        | —     | 3.239                     | −0.081   |                 |          |                  |          |
| 1rpg  | 1.4        | —     | 3.264                     | −0.056   | 3.459           | 0.139    | 3.519            | 0.169    |
| 1ruv  | 1.3        | —     | 3.177                     | −0.143   | 3.426           | 0.106    | 3.468            | 0.118    |
| 1xps  | 1.8        | A     | 3.259                     | −0.061   |                 |          | 3.419            | 0.069    |
| 1xps  | 1.8        | B     | 3.279                     | −0.041   | 3.213           | −0.107   |                  |          |
| 1xpt  | 1.9        | A     | 3.343                     | 0.023    |                 |          |                  |          |
| 1xpt  | 1.9        | B     | 3.203                     | −0.117   |                 |          |                  |          |
| 3rn3  | 1.45       | —     | 3.217                     | −0.103   | 3.405           | 0.085    | 3.469            | 0.119    |
| 3rsd  | 1.6        | —     | 3.177                     | −0.143   | 3.339           | 0.019    | 3.477            | 0.127    |
| 3rsk  | 2          | —     | 3.096                     | −0.224   |                 |          | 3.508            | 0.158    |
| 3rsp  | 1.7        | —     | 3.207                     | −0.114   | 3.475           | 0.155    |                  |          |
| 4rsd  | 1.6        | —     | 3.219                     | −0.101   | 3.145           | −0.175   | 3.504            | 0.154    |
| 8rat  | 1.5        | —     | 3.160                     | −0.160   | 3.367           | 0.047    | 3.415            | 0.065    |
| 8rsa  | 1.8        | A     | 3.127                     | −0.193   |                 |          | 3.479            | 0.129    |
| 8rsa  | 1.8        | B     | 3.128                     | −0.192   | 3.399           | 0.079    | 3.524            | 0.174    |
| 9rsa  | 1.8        | A     | 3.066                     | −0.254   |                 |          | 3.323            | −0.027   |
| 9rsa  | 1.8        | B     | 3.184                     | −0.136   | 3.353           | 0.033    | 3.490            | 0.140    |



**Table S3.** Nonbonded S...X interactions found in lysozyme.Distances (r) and the relative distances [ $d = r - \text{vdw}(\text{S}) - \text{vdw}(\text{X})$ ] are given in Å.

| PDBID | Resolution | Chain | S(C127)...O(I124) |          | S(C30)...Nε(W123) |          | S(C80)...N(N65) * ** |          | S(C127)...Nη(R5) |          |
|-------|------------|-------|-------------------|----------|-------------------|----------|----------------------|----------|------------------|----------|
|       |            |       | r(S...O)          | d(S...O) | r(S...N)          | d(S...N) | r(S...N)             | d(S...N) | r(S...N)         | d(S...N) |
| 135L  | 1.3        | —     | 3.464             | 0.144    | 3.307             | −0.043   | 3.493                | 0.143    | 3.492            | 0.142    |
| 193L  | 1.33       | —     | 3.260             | −0.060   | 3.320             | −0.030   | 3.547                | 0.197    | 3.323            | −0.027   |
| 194L  | 1.4        | —     | 3.250             | −0.070   | 3.287             | −0.063   | 3.505                | 0.155    | 3.290            | −0.060   |
| 1A2Y  | 1.5        | C     |                   |          |                   |          | 3.415                | 0.065    |                  |          |
| 1AKI  | 1.5        | —     | 3.451             | 0.131    | 3.371             | 0.021    |                      |          |                  |          |
| 1HF4  | 1.45       | A     | 3.390             | 0.070    | 3.227             | −0.123   |                      |          |                  |          |
| 1HF4  | 1.45       | B     |                   |          | 3.295             | −0.055   | 3.526                | 0.176    |                  |          |
| 1IEE  | 0.94       | A     | 3.426             | 0.106    | 3.334             | −0.016   | 3.519                | 0.169    |                  |          |
| 1IWT  | 1.4        | A     |                   |          |                   |          |                      |          | 3.264            | −0.086   |
| 1IWU  | 1.4        | A     |                   |          |                   |          |                      |          | 3.256            | −0.094   |
| 1IWV  | 1.4        | A     |                   |          |                   |          |                      |          | 3.309            | −0.041   |
| 1IWW  | 1.4        | A     |                   |          |                   |          | 3.548                | 0.198    | 3.322            | −0.028   |
| 1IWX  | 1.4        | A     |                   |          |                   |          |                      |          | 3.211            | −0.139   |
| 1IWY  | 1.4        | A     |                   |          |                   |          | 3.521                | 0.171    | 3.321            | −0.029   |
| 1IWZ  | 1.4        | A     | 3.510             | 0.190    |                   |          | 3.542                | 0.192    | 3.530            | 0.180    |
| 1JSE  | 1.12       | —     | 3.459             | 0.139    | 3.338             | −0.012   | 3.522                | 0.172    |                  |          |
| 1JSF  | 1.15       | —     | 3.501             | 0.181    |                   |          | 3.457                | 0.107    | 3.377            | 0.027    |
| 1JWR  | 1.4        | A     | 3.506             | 0.186    |                   |          |                      |          | 3.327            | −0.023   |
| 1LJN  | 1.19       | A     | 3.491             | 0.171    | 3.338             | −0.012   | 3.535                | 0.185    |                  |          |
| 1LKS  | 1.1        | —     | 3.382             | 0.062    | 3.510             | 0.160    |                      |          | 3.536            | 0.186    |
| 1LZ1  | 1.5        | —     |                   |          |                   |          | 3.511                | 0.161    | 3.437            | 0.087    |
| 1LZ3  | 1.5        | —     |                   |          | 3.334             | −0.016   | 3.535                | 0.185    | 3.525            | 0.175    |
| 1LZB  | 1.5        | —     | 3.319             | −0.002   | 3.292             | −0.058   | 3.492                | 0.142    | 3.472            | 0.122    |
| 1LZR  | 1.5        | —     | 3.482             | 0.162    |                   |          | 3.511                | 0.161    | 3.418            | 0.068    |
| 1QIO  | 1.2        | A     | 3.397             | 0.077    | 3.390             | 0.040    |                      |          |                  |          |
| 1REX  | 1.5        | —     |                   |          |                   |          | 3.403                | 0.053    | 3.522            | 0.172    |
| 2IHL  | 1.4        | —     | 3.411             | 0.091    | 3.473             | 0.123    | 3.471                | 0.121    |                  |          |
| 3LZT  | 0.92       | —     | 3.285             | −0.035   | 3.514             | 0.164    | 3.546                | 0.196    | 3.474            | 0.124    |
| 4LZT  | 0.95       | —     | 3.388             | 0.068    | 3.486             | 0.136    | 3.536                | 0.186    |                  |          |

\* S(C80)...N(D66) for 135L, 1HF4, 1JSE, 1LJN, 2IHL. \*\* S(C81)...N(N66) for 1IWW, 1IWY, 1IWZ, 1JSF, 1LZ1, 1LZR, 1REX.
